# Supplementary material
Source: publisher figshare collection journal article supplement (https://gsajournals.figshare.com/ndownloader/files/13778774)
Supplement: Supplementary file 1 [file 13778774]

## Sheet: Sheet1
File S1A: Parental and breeding population sizes across various scenarios of GARS and PRS
Designated parameter	Parental population size$	Breeding population size*
		GARS		PRS
		S0	S1	S0	S1#
No limitation in the number of phenotyped S1 families .
Base/training population size		400	-	400	-
par5_pop50	5	50	-	50	50
par20_pop200	20	200	-	200	200
par100_pop1000	100	1000	-	1000	1000
par200_pop2000	200	2000	-	2000	2000
Scenarios in which the number of phenotyped S1 families was capped at 500.
par100_pop500	100	500	-	500	500
par200_pop500	200	500	-	500	500
$-the different parental population sizes were selected initially from the base population and subsequently from S0 (based on GEBVs in GARS2 and GARS3) and S1 (based phenitypic values in PRS
*-Breeding populations were generated by inter-mating the selected parents randomly
#-S1 families were generated by selfing the S0 individuals and were evaluated at multiple location
File S1B: Cost estimates for various activities in GARS and PRS. Cost estimates are based on the current budget estimates from Chibas sorghum breeding program
Activities	Unit costs (USD)	PRS	GARS2	GARS3
Training (base) population phenotyping	33	One time cost (before beginning of PRS	1 per year and replication	1 per year and replication
Training population DNA extraction	12	NA	One time cost	One time cost
Training population genotyping and bioinformatics	5, 10, 15, 25	NA	One time cost	One time cost
Inter-crossing of selected parents	38	1 / year	2 / year	3 / year
S0 → S1 (selfing S0)	14	1 / year	NA	NA
S1 evaluation	33	1 / year / replication	NA	NA
S0 → dna extraction	10	NA	2 / year	3 / year
Genotyping of the S0	5, 10, 15, 25	NA	2 / year	3 / year
